# Supplementary material for: Plasma metabolites associated with colorectal cancer: A discovery‐replication strategy
Source: PubMed Central journal article supplement (PMC6614008; doi:10.1002/ijc.32146), 2019-02-14
Supplement: NIHMS1017822-supplement-Supp_TableS2.pdf [file NIHMS1017822-supplement-Supp_TableS2.pdf]

**Supplementary Table S2. Metabolite identifications of the 97 replicated features**

The red features represent the most intense feature belonging to a compound.

| cpd#                | monoisotopic mass@retention time | Compound name        | Level according to the Metabolomics Standards Initiative |
|---------------------|----------------------------------|----------------------|----------------------------------------------------------|
| 1                   | 122.9206@0.56447005              | Unknown              | 4                                                        |
|                     | 205.8796@0.5669058               |                      |                                                          |
|                     | 207.8776@0.56648636              |                      |                                                          |
|                     | 273.8663@0.56767327              |                      |                                                          |
|                     | 289.8411@0.5683634               |                      |                                                          |
|                     | 341.8549@0.56762207              |                      |                                                          |
|                     | 357.8274@0.56829727              |                      |                                                          |
|                     | 409.8426@0.56771487              |                      |                                                          |
|                     | 425.8154@0.5682527               |                      |                                                          |
|                     | 445.8809@0.56495804              |                      |                                                          |
|                     | 493.8012@0.56823456              |                      |                                                          |
|                     | 513.8702@0.5653107               |                      |                                                          |
|                     | 561.7904@0.5682394               |                      |                                                          |
|                     | 565.8809@0.56176305              |                      |                                                          |
|                     | 581.8576@0.56466657              |                      |                                                          |
|                     | 623.8351@0.5579561               |                      |                                                          |
|                     | 629.7794@0.56837577              |                      |                                                          |
|                     | 649.8467@0.5632472               |                      |                                                          |
|                     | 657.8285@0.55736333              |                      |                                                          |
|                     | 691.8246@0.556467                |                      |                                                          |
|                     | 697.7639@0.56842214              |                      |                                                          |
|                     | 717.8281@0.5610313               |                      |                                                          |
|                     | 765.7508@0.56839013              |                      |                                                          |
| 785.8171@0.5577929  |                                  |                      |                                                          |
| 853.8052@0.5547323  |                                  |                      |                                                          |
| 921.7903@0.55131626 |                                  |                      |                                                          |
| 937.7639@0.559643   |                                  |                      |                                                          |
| 2                   | 136.0636@0.58916837              | 1-methylnicotinamide | 1                                                        |
| 3                   | 125.0146@0.6277308               | Taurine              | 1                                                        |
| 4                   | 71.074@0.8027233                 | Valine               | 1                                                        |

139.0611@0.80280536

|    |                                                                                                                                                                                                                                                                                              |                     |   |
|----|----------------------------------------------------------------------------------------------------------------------------------------------------------------------------------------------------------------------------------------------------------------------------------------------|---------------------|---|
| 5  | 157.1107@0.8299292                                                                                                                                                                                                                                                                           | Unknown             | 4 |
| 6  | 190.0061@0.83498704                                                                                                                                                                                                                                                                          | Unknown             | 4 |
| 7  | 136.0381@1.1621803                                                                                                                                                                                                                                                                           | <b>Hypoxanthine</b> | 1 |
| 7  | 136.0384@0.85686004                                                                                                                                                                                                                                                                          |                     |   |
| 8  | 85.0889@1.4623561                                                                                                                                                                                                                                                                            | <b>Leucine</b>      | 1 |
| 9  | 279.1473@2.7668757                                                                                                                                                                                                                                                                           | Unknown             | 4 |
| 10 | 171.0292@2.8578448                                                                                                                                                                                                                                                                           | Unknown             | 4 |
| 11 | 143.0166@3.3154876<br>200.0362@3.3102927<br>214.0152@3.31054<br>231.9886@3.3105862<br>232.0561@3.3086596<br>232.0574@3.310062<br>245.0312@3.3104632<br>246.0422@3.310548<br><b>247.0286@3.3104632</b><br>250.0351@3.310955<br>261.0059@3.3104744<br>264.0146@3.3119278<br>282.0348@3.3101916 | Unknown             | 4 |
| 12 | 181.1113@5.475981                                                                                                                                                                                                                                                                            | Unknown             | 4 |
| 13 | 266.1351@6.8201194                                                                                                                                                                                                                                                                           | <b>LysoPC(16:1)</b> | 2 |
| 14 | 481.3159@6.8777747                                                                                                                                                                                                                                                                           | <b>LysoPC(15:0)</b> | 2 |
| 15 | 525.2864@6.888085                                                                                                                                                                                                                                                                            | <b>LysoPE(22:6)</b> | 2 |

|    |                                                                                                                                                                                                                                                            |                     |   |
|----|------------------------------------------------------------------------------------------------------------------------------------------------------------------------------------------------------------------------------------------------------------|---------------------|---|
| 16 | 501.285@6.8980646<br>523.2694@6.8969865                                                                                                                                                                                                                    | LysoPE(20:4)        | 2 |
| 17 | 495.3333@6.9326496                                                                                                                                                                                                                                         | LyosPC(16:0) isomer | 2 |
| 18 | 523.2949@6.996259<br>523.7955@6.9962544<br>522.2939@6.9969144<br>522.7951@6.996832<br>762.478@6.997659<br>770.46@6.997441<br>761.976@6.99754<br>769.9581@6.9974766<br>517.3147@6.9961543<br>506.3191@6.9973693<br>495.3327@6.9956923<br>990.6655@6.9950514 | LysoPC (16:0)       | 2 |
| 19 | 527.312@7.05021<br>527.8146@7.050606<br>535.2997@7.0497603                                                                                                                                                                                                 | Unknown             | 4 |
| 20 | 479.3405@7.1102185                                                                                                                                                                                                                                         | LysoPC(P-16:0)      | 2 |
| 21 | 509.3468@7.1235833                                                                                                                                                                                                                                         | LysoPC(17:0)        | 2 |
| 22 | 602.9412@7.1884513<br>597.4188@7.187734<br>610.9343@7.191048<br>611.4359@7.191536                                                                                                                                                                          | Unknown             | 4 |
| 23 | 103.0997@7.241595<br>523.364@7.2414613<br>534.8485@7.241308<br>534.3476@7.2410583<br>542.3386@7.2418456<br>542.8411@7.2418675                                                                                                                              | LysoPC(18:0)        | 2 |

550.3265@7.2414513  
550.8254@7.2414603

|    |                                                                                                        |                  |   |
|----|--------------------------------------------------------------------------------------------------------|------------------|---|
| 24 | 545.3467@7.2500143                                                                                     | Unknown          | 4 |
| 25 | 452.8025@7.3067145                                                                                     | Unknown          | 4 |
| 26 | 639.4673@7.4324927<br>638.9663@7.4319897                                                               | Unknown          | 4 |
| 27 | 428.3615@7.4910417                                                                                     | Unknown          | 4 |
| 28 | 284.1159@7.9399796<br>314.1271@7.94182<br>580.232@7.9397755<br>612.2575@7.940997<br>644.2827@7.9412355 | <b>Bilirubin</b> | 1 |
